# Supplementary material for: Semisynthesis and Antifeedant Activity of New Derivatives of a Dihydro-β-Agarofuran from Parnassia wightiana
Source: PubMed Central journal article supplement (PMC3821568; doi:10.3390/ijms141019484), 2013-09-26
Supplement: ijms-14-19484-s001.pdf [file ijms-14-19484-s001.pdf]

# Supplementary Information

Figure 1.  $^1\text{H}$  NMR (500 MHz,  $\text{CDCl}_3$ ) spectra of compound 2.

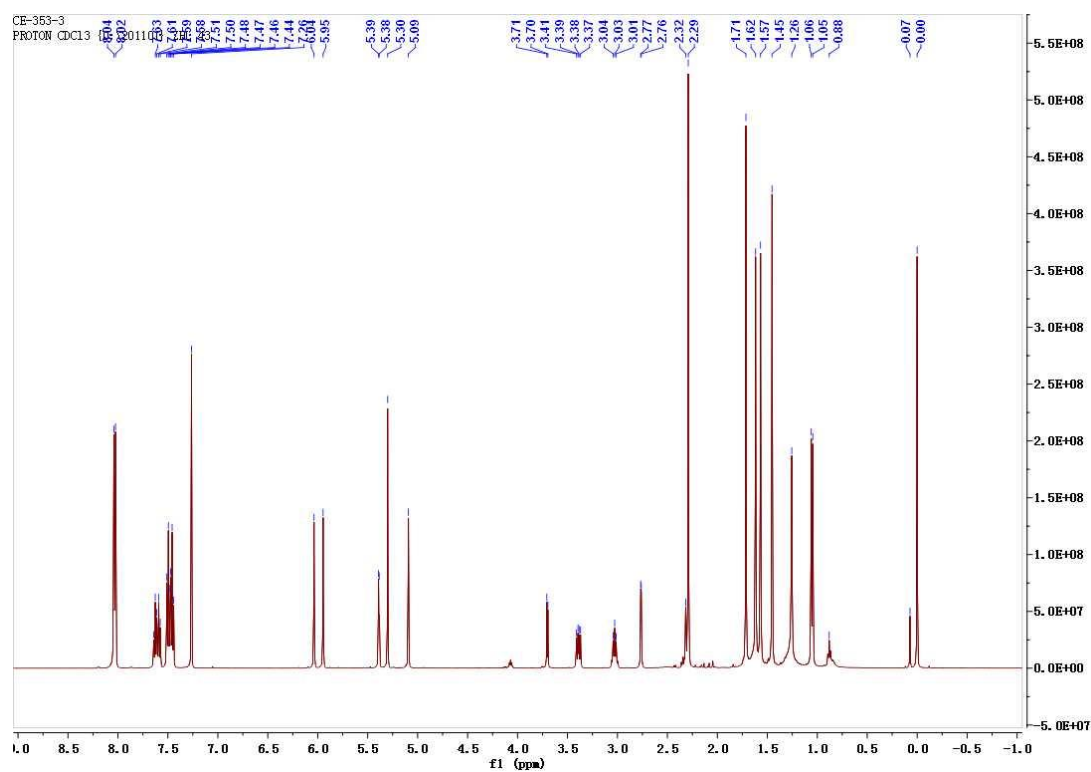

Figure 2.  $^{13}\text{C}$  NMR (500 MHz,  $\text{CDCl}_3$ ) spectra of compound 2.

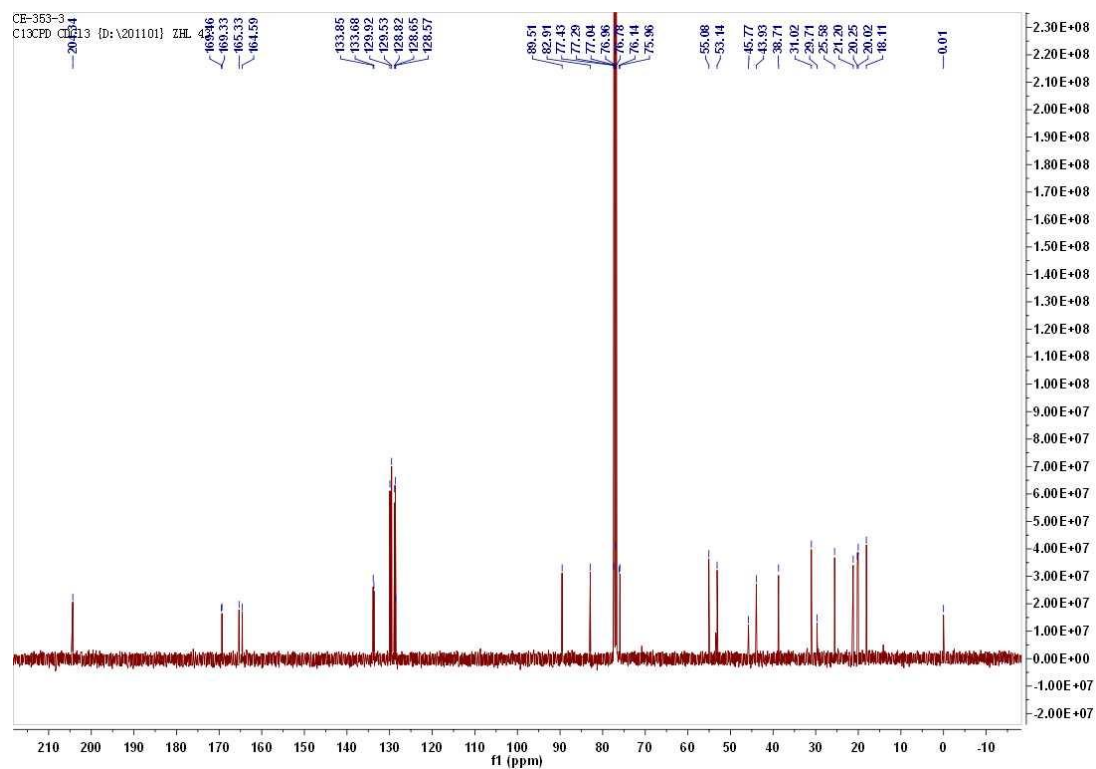

**Figure 3.**  $^1\text{H}$ - $^1\text{H}$  COSY (400 MHz,  $\text{CDCl}_3$ ) spectra of compound 2.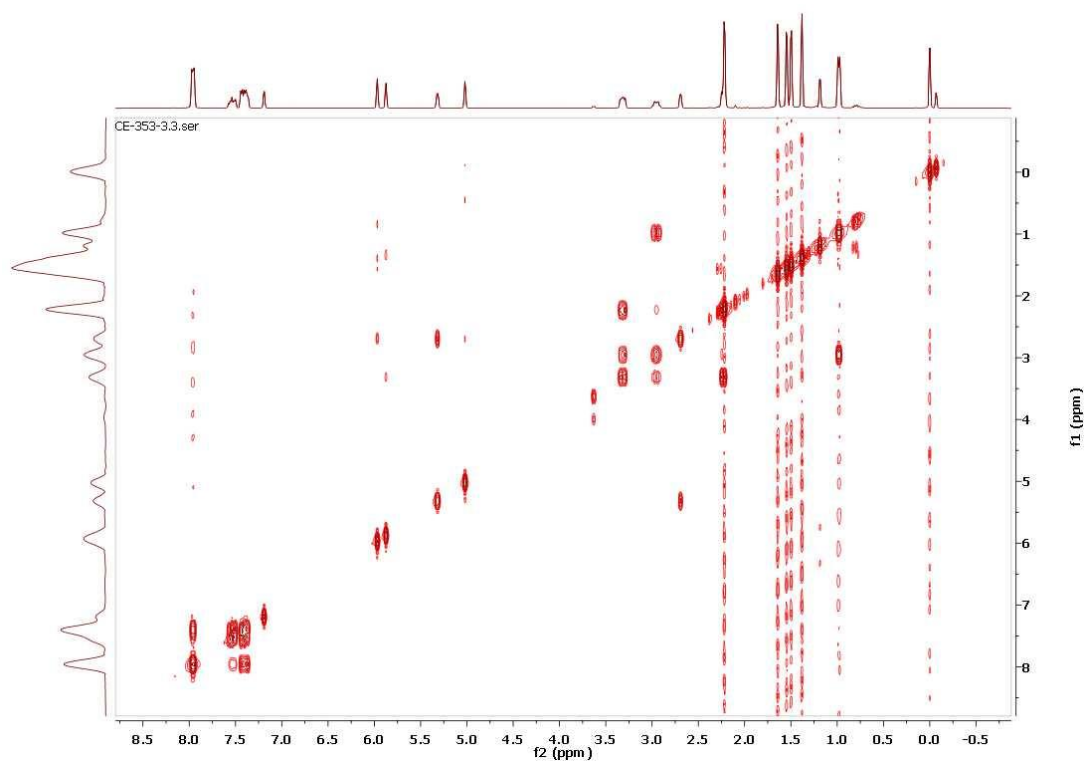**Figure 4.** HMBC (400 MHz,  $\text{CDCl}_3$ ) spectra of compound 2.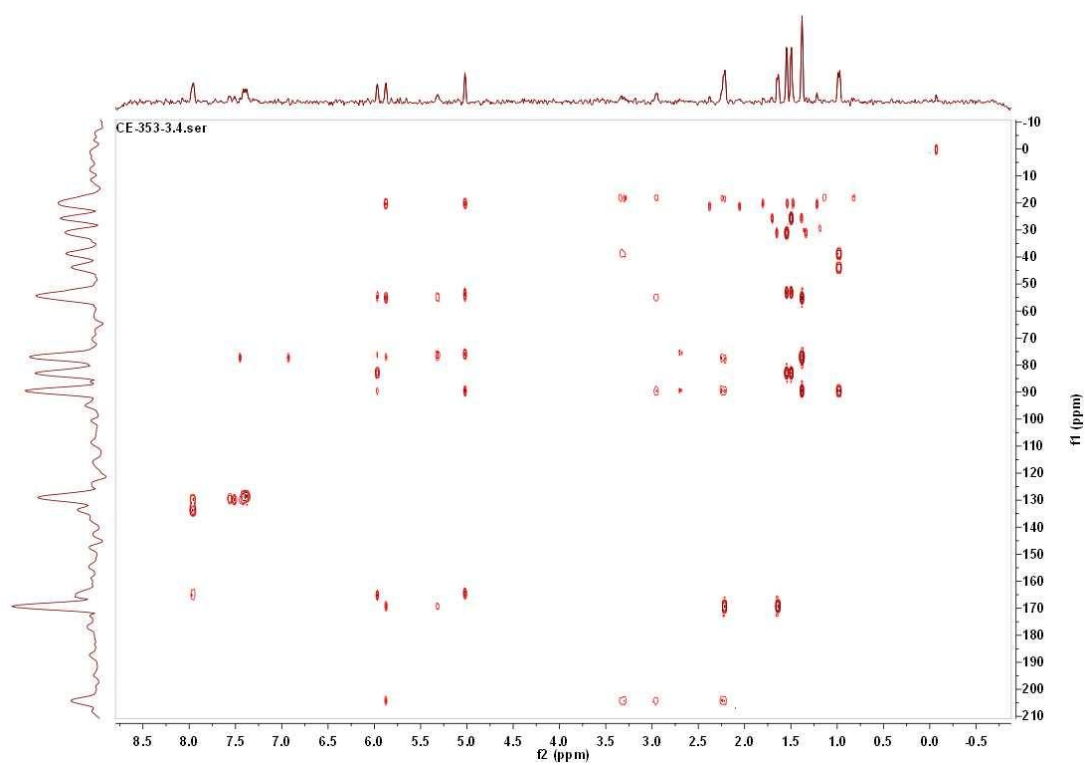

**Figure 5.** HSQC (400 MHz, CDCl<sub>3</sub>) spectra of compound 2.

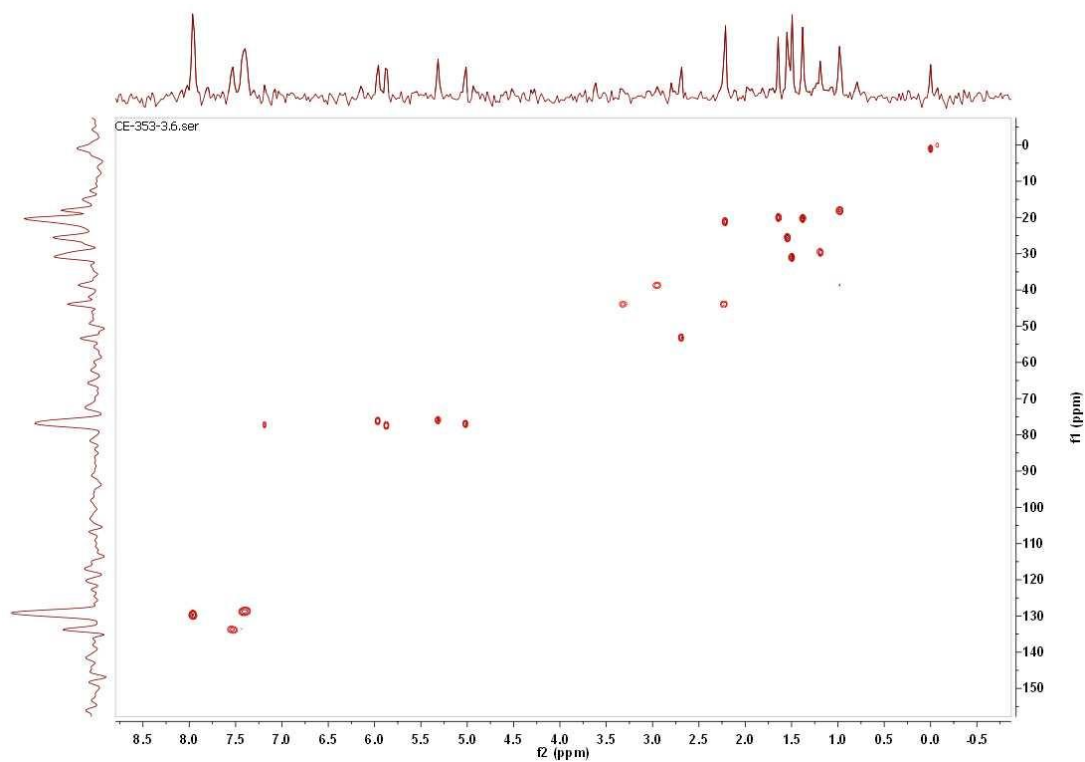

**Figure 6.** NOESY (400 MHz, CDCl<sub>3</sub>) spectra of compound 2.

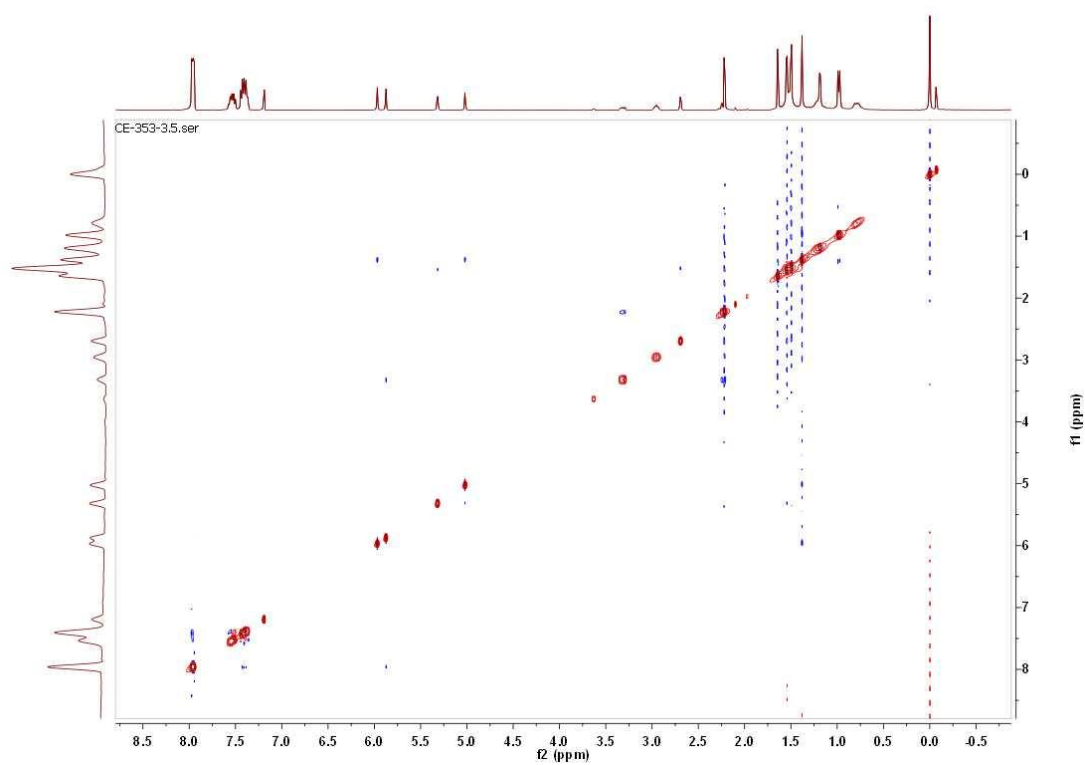

Figure 7. HRESIMS spectra of Compound 2.

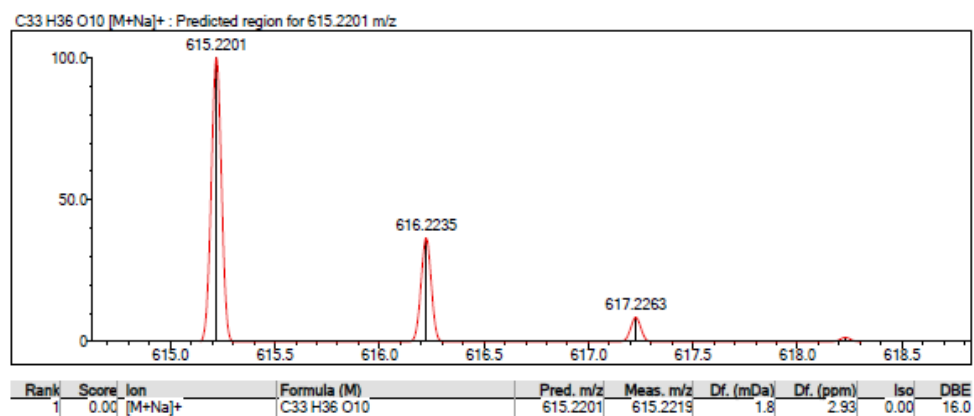Figure 8. <sup>1</sup>H NMR (500 MHz, CDCl<sub>3</sub>) spectra of compound 3.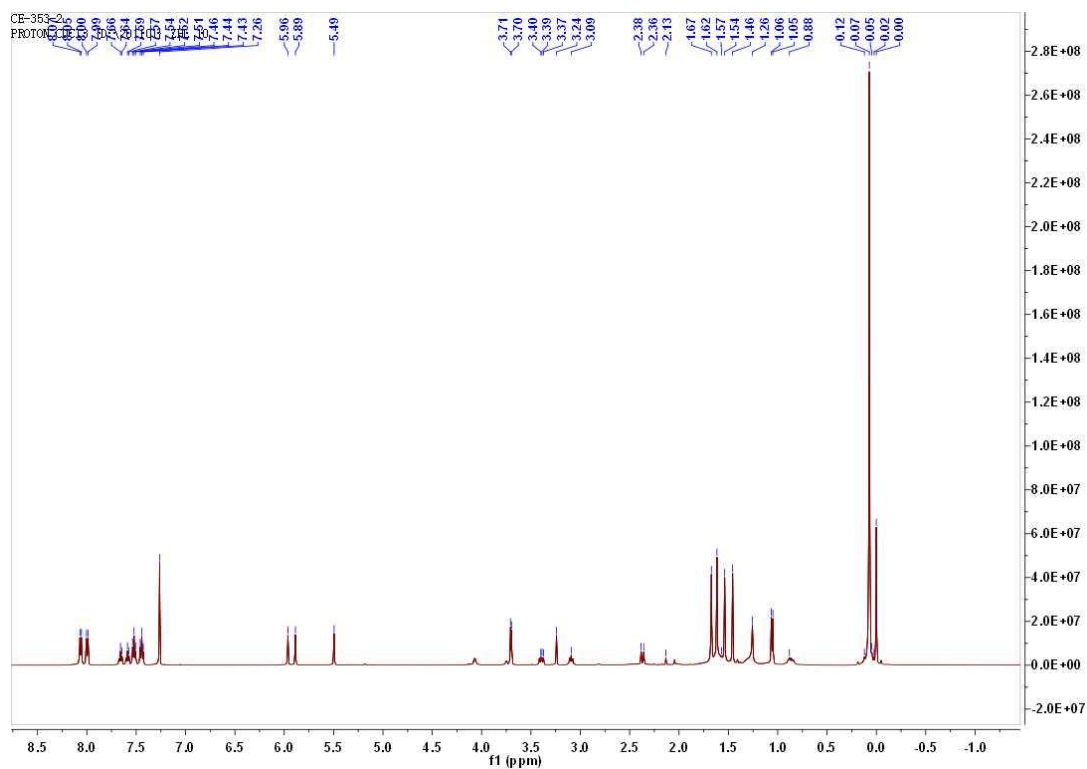

Figure 9.  $^{13}\text{C}$  NMR (500 MHz,  $\text{CDCl}_3$ ) spectra of compound 3.

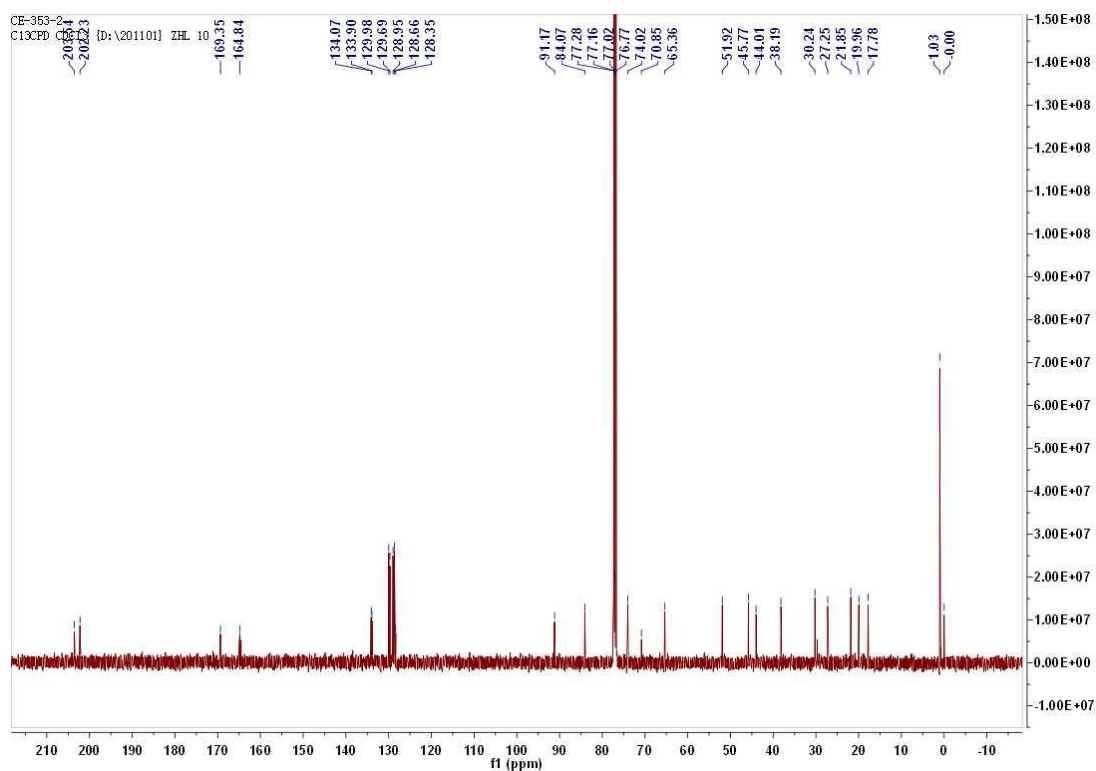

Figure 10. HRESIMS spectra of Compound 3.

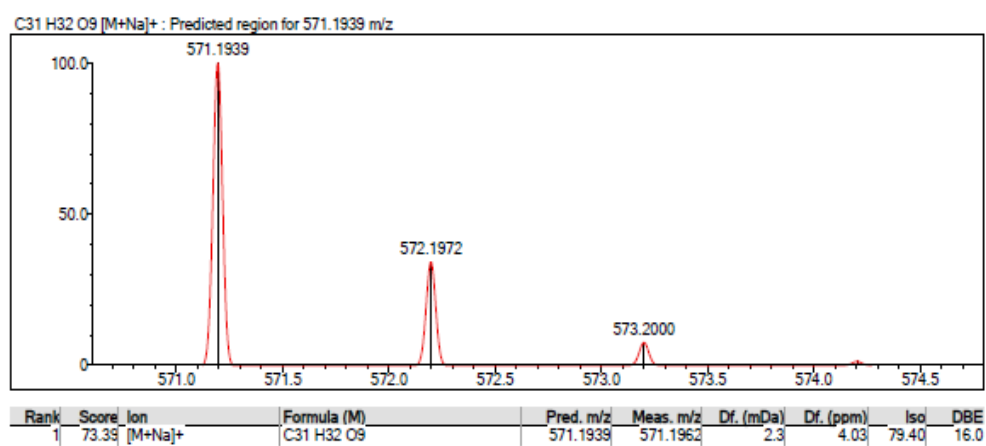

**Figure 11.**  $^1\text{H}$  NMR (500 MHz,  $\text{CDCl}_3$ ) spectra of compound 4.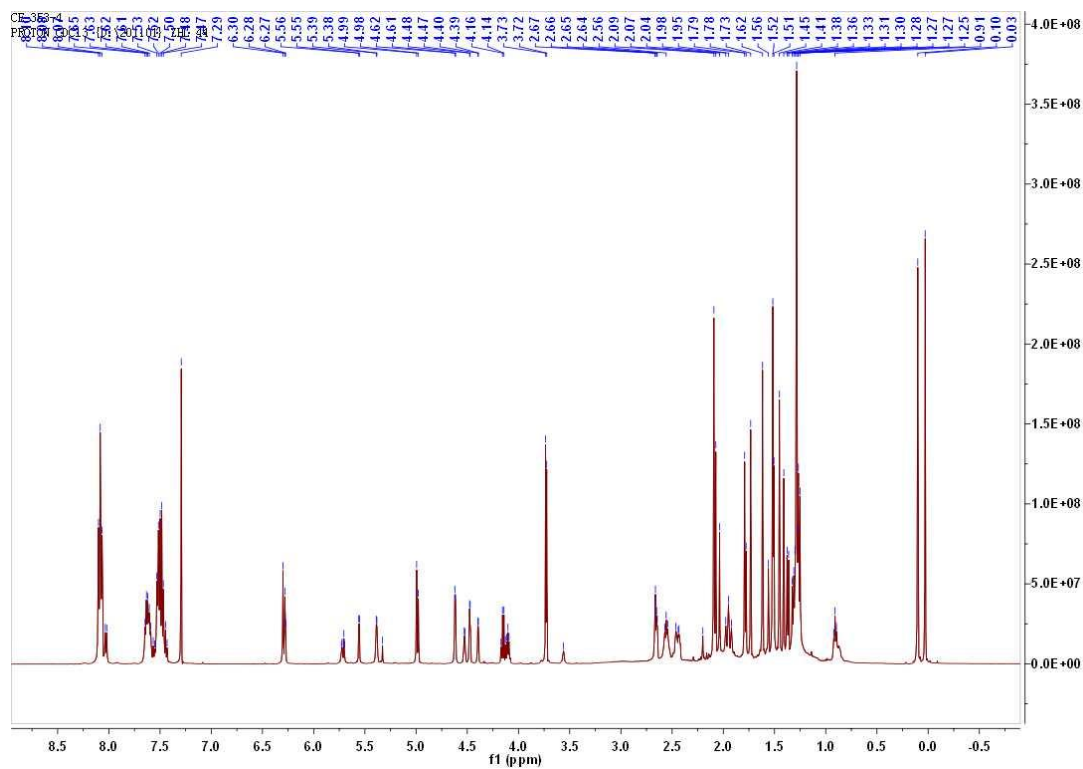**Figure 12.**  $^{13}\text{C}$  NMR (500 MHz,  $\text{CDCl}_3$ ) spectra of compound 4.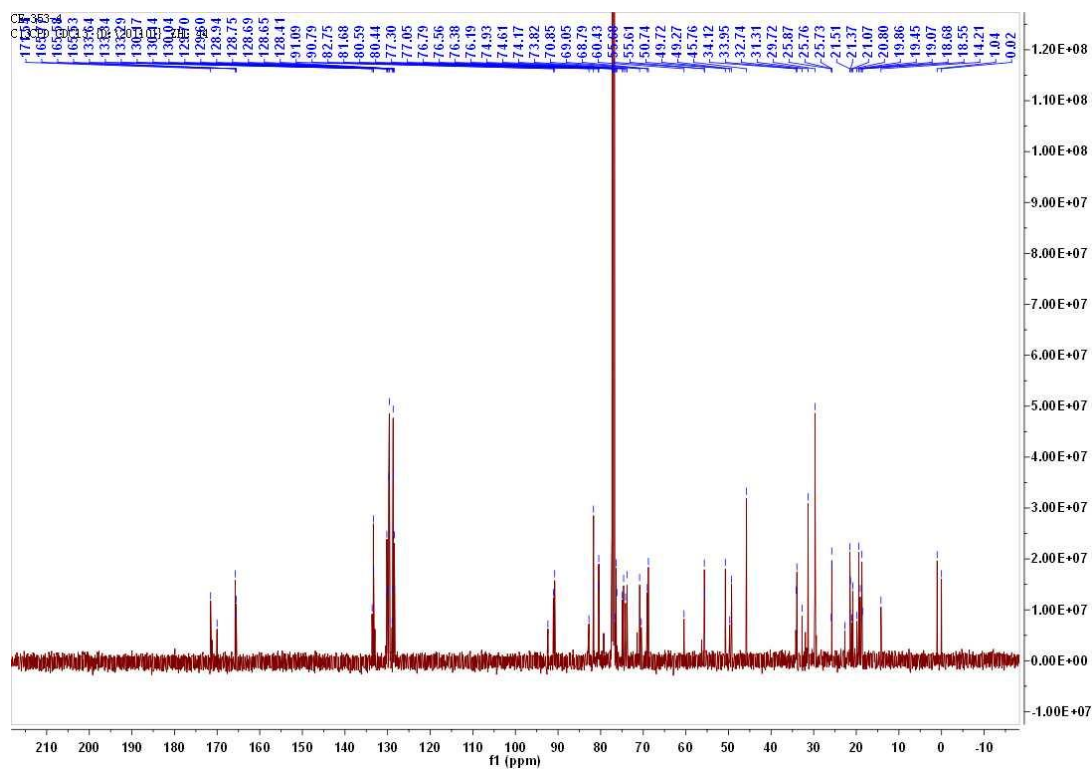

**Figure 13.** HRESIMS spectra of Compound 4.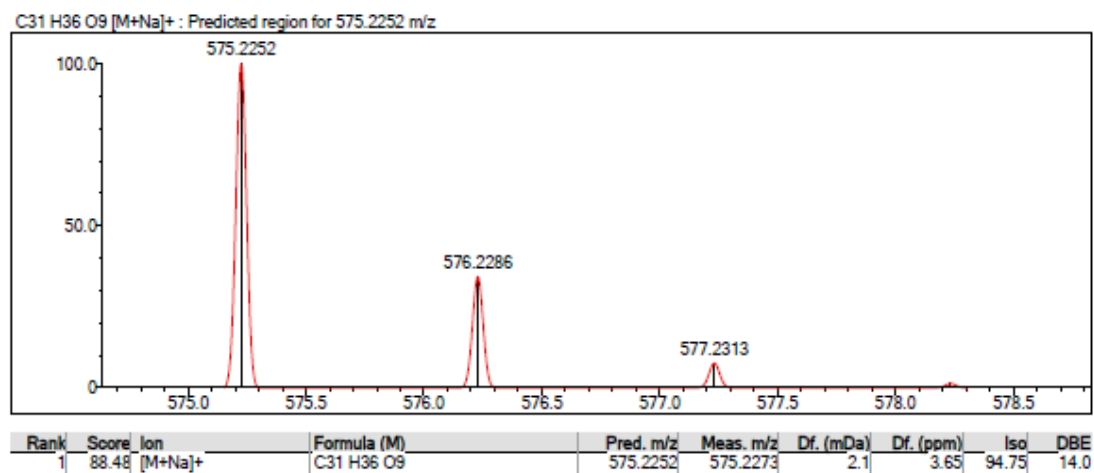**Figure 14.** <sup>1</sup>H NMR (500 MHz, CDCl<sub>3</sub>) spectra of compound 5.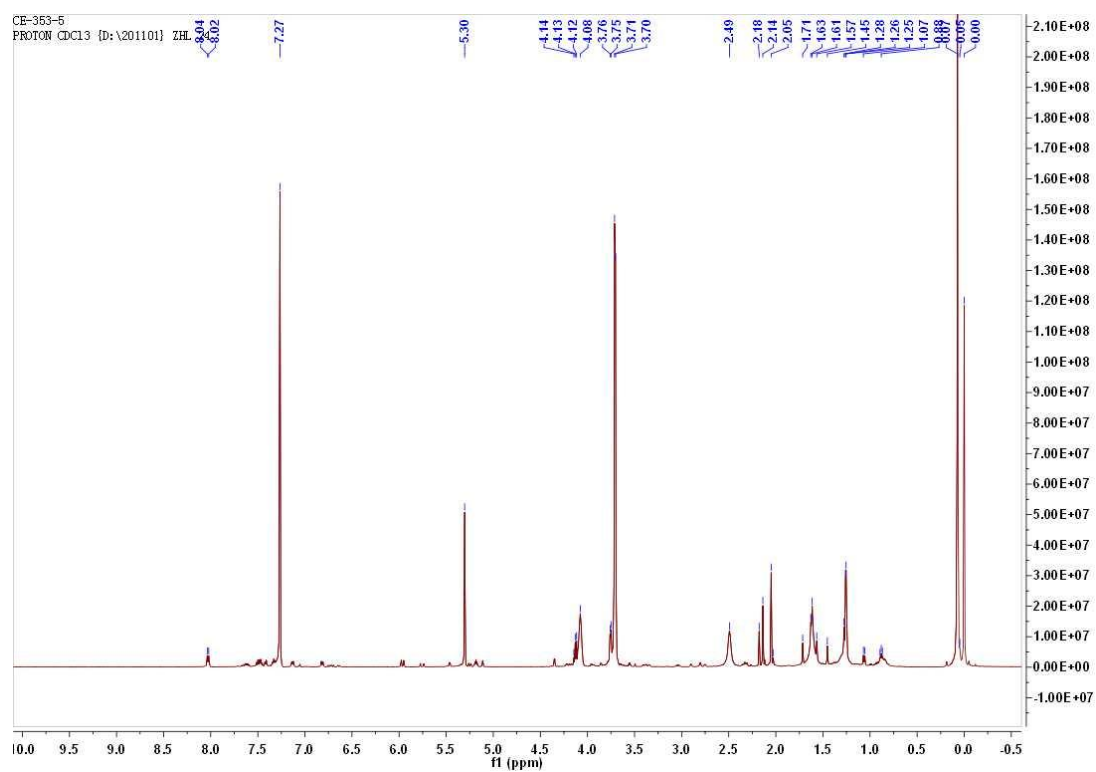

Figure 15. <sup>13</sup>C NMR (500 MHz, CDCl<sub>3</sub>) spectra of compound 5.

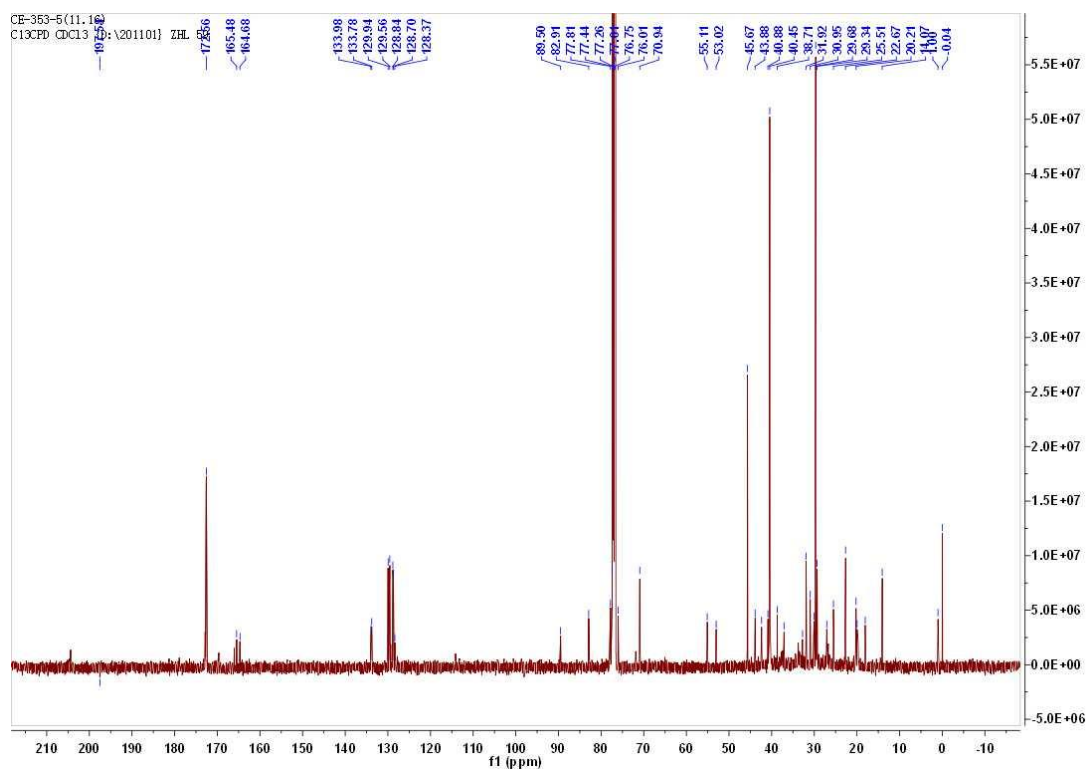

Figure 16. HRESIMS spectra of Compound 5.

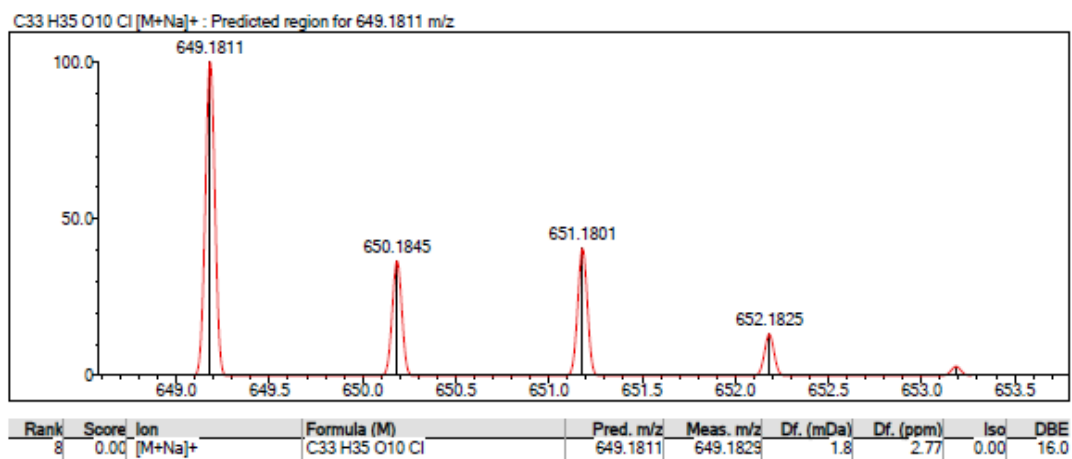



**Figure 17.**  $^1\text{H}$  NMR (500 MHz,  $\text{CDCl}_3$ ) spectra of compound **6**.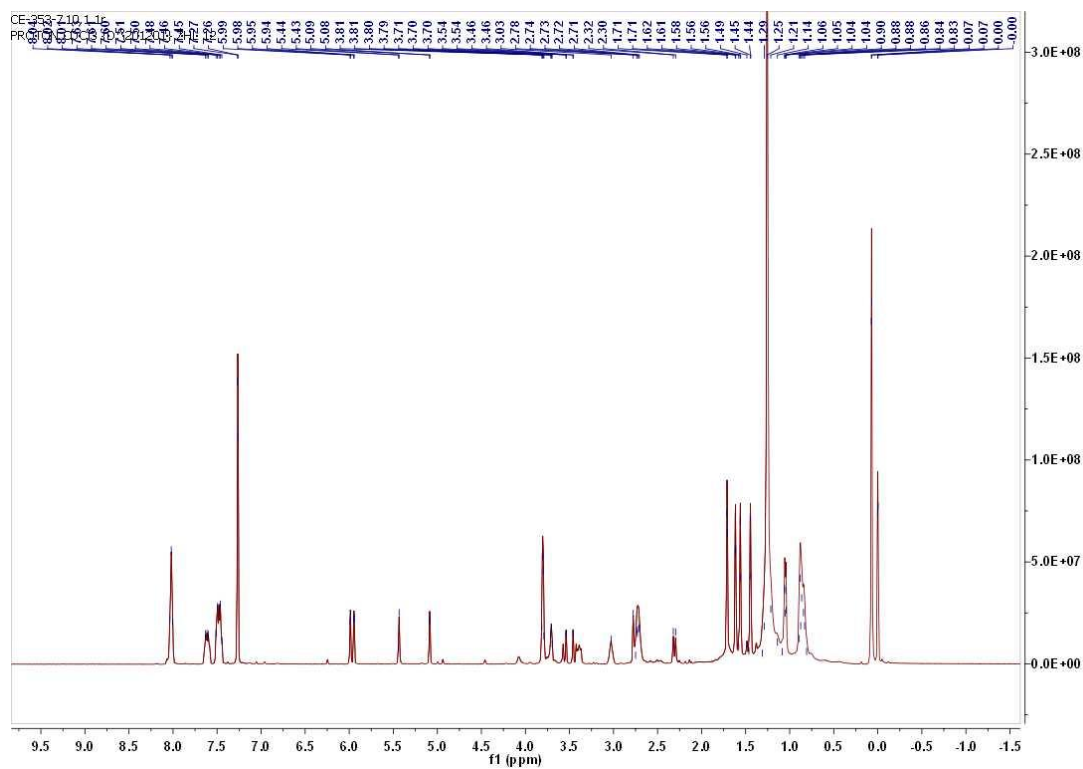**Figure 18.**  $^{13}\text{C}$  NMR (500 MHz,  $\text{CDCl}_3$ ) spectra of compound **6**.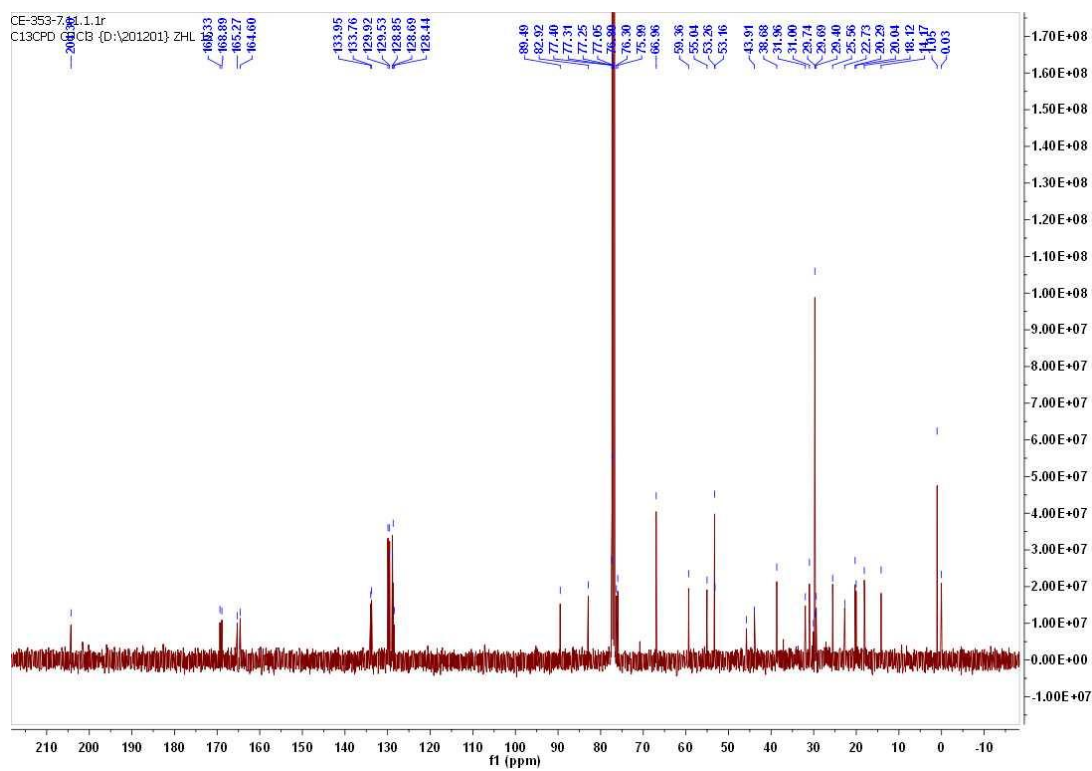

**Figure 19.** HRESIMS spectra of Compound 6.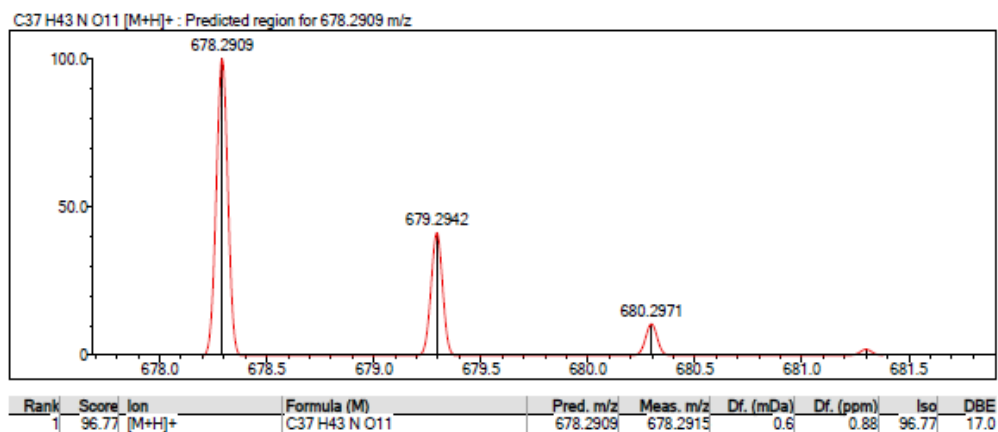

© 2013 by the authors; licensee MDPI, Basel, Switzerland. This article is an open access article distributed under the terms and conditions of the Creative Commons Attribution license (<http://creativecommons.org/licenses/by/3.0/>).
